# Supplementary material for: 3+1 Resonance enhanced multiphoton ionisation spectroscopy of HBr
Source: Royal Society of Chemistry journal article supplement (doi:10.1039/b007425j), 2001-01-01
Supplement: tables.pdf [file tables.pdf]

Table S1: Observed lines from  $X^1\Sigma^+$  of  $\text{H}^{81}\text{Br}^a$  to  $0^+$  states

| $J$ | $P(J)$   | $R(J)$                 | $T(J)$  | $J$ | $P(J)$  | $R(J)$                       | $T(J)$ |
|-----|----------|------------------------|---------|-----|---------|------------------------------|--------|
|     |          | $j^3\Sigma^- - X(0-0)$ |         |     |         | $j^3\Sigma^- - X(1-0)$       |        |
| 0   |          | 82199.5                | 82268.1 | 0   |         | 84467.7                      |        |
| 1   | 82168.6  | 82210.6                |         | 1   |         | 84479.1                      |        |
| 2   | 82149.3  | 82217.7                |         | 2   | 84418.0 | 84486.4                      |        |
| 3   | 82126.7  | 82221.9                |         | 3   | 84395.0 | 84491.9                      |        |
| 4   | 82100.7  |                        |         | 4   | 84369.7 | 84492.9                      |        |
|     |          | $E^1\Sigma^+ - X(2-0)$ |         |     |         | $[6p\pi]^3\Sigma^- - X(0-0)$ |        |
| 0   |          | 82289.0                | 82356.3 | 0   |         | 84822.3                      |        |
| 1   | 82259.4  | 82299.8                | 82392.8 | 1   | 84790.8 | 84837.3                      |        |
| 2   | 82238.9  | 82307.4                | 82425.3 | 2   | 84772.9 | 84851.0                      |        |
| 3   |          |                        | 82453.3 | 3   | 84754.7 | 84864.3                      |        |
|     |          | $m^3\Pi - X(0-0)$      |         |     |         | $r^3\Pi - X(0-0)$            |        |
| 0   |          | 83469.3                |         | 4   | 84734.9 | 84876.4                      |        |
| 1   | 83437.0  | 83484.3                |         | 5   | 84714.7 | 84888.6                      |        |
| 2   | 83419.2* | 83498.2                |         |     |         |                              |        |
| 3   |          | 83512.1                |         | 0   |         | 85917.1                      |        |
| 4   |          | 83524.2                |         | 1   | missing | 85931.2                      |        |
|     |          | $H^1\Sigma^+ - X(2-0)$ |         | 2   | 85867.6 | 85945.2                      |        |
| 0   |          | 84050.2                |         | 3   |         | 85958.5*                     |        |
| 1   | 84024.2  | 84052.8                |         | 4   |         | 85970.5                      |        |
| 2   | 84001.0  | 84048.2                |         |     |         |                              |        |
| 3   | 83970.0  | 84036.1                |         | 0   |         | $[5d\pi]^1\Sigma^+ - X(0-0)$ |        |
| 4   | 83931.3  |                        |         | 1   |         | 86523.1                      |        |
|     |          | $E^1\Sigma^+ - X(3-0)$ |         | 2   |         | 86533.5                      |        |
| 0   |          | 84262.4                |         | 3   |         | 86540.2                      |        |
| 1   | 84234.6  | 84267.9                |         | 4   |         | 86543.2                      |        |
| 2   | 84211.1  | 84271.3                |         |     |         | 86545.1                      |        |
| 3   | 84183.9  | 84273.6                |         |     |         |                              |        |

(a) Energies are given in  $\text{cm}^{-1}$  (vacuum corrected).

(b) Asterisks (\*) indicate blended lines. Italics indicate very weak lines

Table S1: continued

| $J$ | $P(J)$  | $R(J)$                            | $T(J)$  | $J$ | $P(J)$  | $R(J)$                          | $T(J)$  |
|-----|---------|-----------------------------------|---------|-----|---------|---------------------------------|---------|
|     |         | $j \ ^3\Sigma^- - X(2 - 0)$       |         |     |         | Band XXXII                      |         |
| 0   |         | 86876.0                           |         | 0   |         | 89962.4                         |         |
| 1   | 86845.8 | 86887.7                           |         | 1   | 89931.7 | 89971.8                         |         |
| 2   | 86826.5 | 86897.3                           |         | 2   | 89912.5 | 89978.7                         |         |
| 3   | 86804.3 | 86904.9                           |         | 3   | 89887.9 |                                 |         |
| 4   | 86780.4 |                                   |         |     |         |                                 |         |
|     |         | $[6p\pi] \ ^3\Sigma^- - X(1 - 0)$ |         |     |         | $[7p\sigma] \ ^3\Pi - X(0 - 0)$ |         |
| 0   |         | 87325.0                           | 87404.1 | 0   |         | 90430.9                         | 90500.5 |
| 1   | 87292.9 | 87339.3                           | 87449.2 | 1   | 90400.5 | 90443.1                         | 90538.6 |
| 2   | 87274.9 | 87353.0                           |         | 2   | 90381.8 | 90450.5                         |         |
| 3   | 87256.8 | 87366.3                           |         | 3   |         | 90454.1                         |         |
| 4   | 87236.9 |                                   |         |     |         |                                 |         |
|     |         | $[5d\sigma] \ ^3\Pi - X(0 - 0)$   |         |     |         |                                 |         |
| 0   |         |                                   | 88083.4 |     |         |                                 |         |
| 1   |         |                                   | 88127.5 |     |         |                                 |         |
| 2   |         |                                   | 88172.8 |     |         |                                 |         |
| 3   |         |                                   | 88216.9 |     |         |                                 |         |

Table S2: Observed lines from  $X^1\Sigma^+$  of  $\text{H}^{81}\text{Br}$   $a,b$  to  $\Omega > 0$  states

| $J$                  | $P(J)$  | $Q(J)$               | $R(J)$  | $S(J)$  | $T(J)$   |
|----------------------|---------|----------------------|---------|---------|----------|
| $k^3\Pi_1 - X(1-0)$  |         |                      |         |         |          |
| 0                    |         |                      | 82761.0 |         |          |
| 1                    |         | 82744.2*             | 82776.0 |         |          |
| 2                    | 82711.0 | *                    | 82789.9 |         |          |
| 3                    | 82692.1 | 82739.9              | 82803.2 |         |          |
| 4                    |         | 82736.4              | 82815.4 |         |          |
| $L^1\Phi_3 - X(0-0)$ |         |                      |         |         |          |
| 0                    |         |                      |         |         | 82957.9  |
| 1                    |         |                      |         | 82941.0 | 83007.9  |
| 2                    |         |                      | 82907.8 | 82974.6 |          |
| 3                    |         | 82857.9              | 82924.6 |         |          |
| 4                    |         |                      |         | 83040.8 |          |
| $K^1\Pi_1 - X(0-0)$  |         |                      |         |         |          |
| 0                    |         |                      | 83252.0 |         | 83322.8  |
| 1                    |         | 83234.7              | 83263.2 | 83305.9 | 83363.7  |
| 2                    | 83201.6 | 83229.4              | 83272.4 | 83329.9 | 83403.1  |
| 3                    | 83180.3 | 83222.3              | 83279.8 |         |          |
| $r^3\Pi_2 - X(0-0)$  |         |                      |         |         |          |
| 0                    |         |                      |         |         | 83370.4  |
| 1                    |         |                      | 83303.4 |         | 83419.0* |
| 2                    |         | 83270.1 <sup>c</sup> | 83320.0 |         | 83466.5  |
| 3                    |         |                      | 83335.4 |         |          |
| 4                    |         |                      | 83349.7 |         |          |
| $r^3\Pi_1 - X(0-0)$  |         |                      |         |         |          |
| 0                    |         |                      | 83309.7 |         | 83391.8  |
| 1                    |         | 83292.6              | 83325.8 |         | 83439.5  |
| 2                    | 83259.5 |                      | 83341.4 |         |          |

(a) Energies are given in  $\text{cm}^{-1}$  (vacuum corrected).

(b) Asterisks (\*) indicate blended lines.

(c) Q branch blended.

Table S2: continued

| $J$                             | $O(J)$ | $P(J)$  | $Q(J)$  | $R(J)$  | $S(J)$  | $T(J)$  |
|---------------------------------|--------|---------|---------|---------|---------|---------|
| $m^3\Pi_1 - X(1 - 0)$           |        |         |         |         |         |         |
| 0                               |        |         |         | 83586.1 |         | 83664.6 |
| 1                               |        |         | *       | 83599.7 |         | 83709.7 |
| 2                               |        | 83536.2 | 83568.1 | 83615.0 |         | 83754.2 |
| 3                               |        | 83518.2 |         |         |         | 83797.5 |
| $M^1\Pi_1 - X(0 - 0)$           |        |         |         |         |         |         |
| 0                               |        |         |         | 83865.2 |         | 83946.7 |
| 1                               |        |         | 83847.5 | 83880.8 | 83929.9 | 83995.7 |
| 2                               |        | 83814.3 |         | 83896.4 | 83961.3 | 84042.9 |
| 3                               |        | 83797.4 |         | 83911.6 |         |         |
| 4                               |        |         |         | 83926.1 |         |         |
| $L^1\Phi_3 - X(1 - 0)$          |        |         |         |         |         |         |
| 0                               |        |         |         |         |         | 85341.4 |
| 1                               |        |         |         |         | 85324.5 | 85389.3 |
| 2                               |        |         |         | 85291.3 | 85355.4 | 85436.0 |
| 3                               |        |         | 85241.1 | 85306.0 | 85386.0 |         |
| 4                               |        |         |         | 85320.0 |         |         |
| $[6d\sigma] ^3\Pi_1 - X(0 - 0)$ |        |         |         |         |         |         |
| Band XVI                        |        |         |         |         |         |         |
| 0                               |        |         |         | 85548.3 |         | 85626.0 |
| 1                               |        |         |         | 85563.0 |         | 85671.1 |
| 2                               |        |         | 85529.9 | 85576.0 |         |         |
| 3                               |        |         | 85526.1 | 85587.1 |         |         |
| 4                               |        |         | 85519.4 |         |         |         |
| $K^1\Pi_1 - X(1 - 0)$           |        |         |         |         |         |         |
| 0                               |        |         |         | 85636.6 |         | 85710.3 |
| 1                               |        |         | 85619.4 | 85649.0 |         | 85752.4 |
| 2                               |        | 85586.8 | 85616.3 | 85660.0 |         | 85791.5 |
| 3                               |        | 85566.4 |         | 85668.3 |         |         |
| 4                               |        | 85543.1 |         | 85675.7 |         |         |

Table S2: continued

| $J$                                 | $O(J)$  | $P(J)$  | $Q(J)$               | $R(J)$   | $S(J)$  | $T(J)$   |
|-------------------------------------|---------|---------|----------------------|----------|---------|----------|
| $R^1\Pi_1 - X(0 - 0)$               |         |         |                      |          |         |          |
| 0                                   |         |         |                      | 85960.1* |         | 86039.9  |
| 1                                   |         |         |                      | 85974.0  |         | 86085.9  |
| 2                                   |         | 85910.1 | 85941.6              | 85988.7  |         | 86132.7  |
| 3                                   | 85859.6 |         |                      | 86002.3  |         | 86178.2  |
| 4                                   | 85825.8 |         |                      |          |         | 86226.2  |
| 5                                   |         |         |                      |          |         | 86273.5  |
| $M^1\Pi_1 - X(1 - 0)$               |         |         |                      |          |         |          |
| 0                                   |         |         |                      | 86245.2  |         | 86324.1* |
| 1                                   |         |         | 86228.2              | 86260.2  |         | 86370.2  |
| 2                                   |         | 86195.2 | 86226.7              | 86273.5  | 86336.8 |          |
| $^3\Phi_3 - X(0 - 0)$               |         |         |                      |          |         |          |
| Band XXI                            |         |         |                      |          |         |          |
| 0                                   |         |         |                      |          |         | 86427.3  |
| 1                                   |         |         |                      |          | 86410.2 | 86480.2  |
| 2                                   |         |         |                      | 86376.9  | 86447.0 | 86533.5  |
| 3                                   |         |         | 86325.2*             | 86396.1  | 86483.7 |          |
| 4                                   |         |         | 86329.3              | 86416.8  | 86521.1 |          |
| [5d $\delta$ ] $^3\Pi_1 - X(0 - 0)$ |         |         |                      |          |         |          |
| 0                                   |         |         |                      | 86602.4  |         | 86686.0  |
| 1                                   |         |         | 86584.7 <sup>c</sup> | 86619.6  |         | 86735.5  |
| 2                                   |         | 86552.4 |                      | 86636.3  |         |          |
| 3                                   |         | 86536.1 |                      | 86652.6  |         |          |
| 4                                   |         | 86520.1 |                      | 86668.0  |         |          |
| 5                                   |         |         |                      | 86682.1  |         |          |
| 6                                   |         |         |                      | 86693.7  |         |          |
| Band XXV                            |         |         |                      |          |         |          |
| 0                                   |         |         |                      | 86993.9  |         | 87078.1  |
| 1                                   |         |         | 86976.5 <sup>c</sup> | 87010.6  |         | 87128.7  |
| 2                                   |         |         |                      | 87027.3  |         |          |

Table S2: continued

| $J$                                | $P(J)$  | $Q(J)$   | $R(J)$  | $S(J)$  | $T(J)$  |
|------------------------------------|---------|----------|---------|---------|---------|
| Band XXVII                         |         |          |         |         |         |
| 0                                  |         |          | 87948.1 |         | 88024.6 |
| 1                                  |         | 87930.2  | 87962.8 |         | 88069.1 |
| 2                                  | 87898.2 | 87927.2  | 87975.5 |         | 88115.7 |
| 3                                  |         | 87924.3  |         |         |         |
| 4                                  |         | 87919.5  |         |         |         |
| [5d $\delta$ ] $^1\Phi_3 - X(0-0)$ |         |          |         |         |         |
| 0                                  |         |          |         |         | 89022.2 |
| 1                                  |         |          |         | 89006.1 | 89077.1 |
| 2                                  |         |          | 88972.5 | 89043.4 | 89131.6 |
| 3                                  |         |          | 88994.1 |         |         |
| $^3\Delta_3 - X(0-0)$              |         |          |         |         |         |
| Band XXX                           |         |          |         |         |         |
| 0                                  |         |          |         |         | 89334.7 |
| 1                                  |         |          |         | 89318.1 | 89392.6 |
| 2                                  |         |          | 89285.4 | 89358.6 |         |
| 3                                  |         |          | 89307.2 |         |         |
| Band XXXI                          |         |          |         |         |         |
| 0                                  |         |          | 89563.7 |         |         |
| 1                                  |         | 89547.4  | 89577.3 |         |         |
| 2                                  | 89513.0 | 89545.1  |         |         |         |
| 3                                  | 89493.8 | 89541.7  |         |         |         |
| 4                                  |         | 89538.0  |         |         |         |
| [7p $\sigma$ ] $^1\Pi_1 - X(0-0)$  |         |          |         |         |         |
| 0                                  |         |          | 90108.8 |         | 90192.0 |
| 1                                  |         | 90090.8* | 90126.2 |         | 90239.6 |
| 2                                  | 90057.9 | *        |         |         | 90286.6 |
| 3                                  | 90041.7 | *        |         |         | 90330.6 |
| 4                                  |         | 90089.8  |         |         |         |
| 5                                  |         | 90086.1  |         |         |         |
| 6                                  |         | 90080.8  |         |         |         |
